# Supplementary material for: An amorphous ZnO and oxygen vacancy modified nitrogen-doped carbon skeleton with lithiophilicity and ionic conductivity for stable lithium metal anodes
Source: Royal Society of Chemistry journal article supplement (doi:10.1039/d2ta03706h), 2022-01-01
Supplement: d2ta03706h1.pdf [file d2ta03706h1.pdf]

# Amorphous ZnO and Oxygen Vacancies Modified Nitrogen-Doped Carbon Skeleton with Lithiophilicity and Ionic Conductivity for Stable Lithium Metal Anode

Fei Wang<sup>a</sup>, Jingxia Gao<sup>b</sup>, Yong Liu<sup>a,c,\*</sup>, Fengzhang Ren<sup>a,\*</sup>,

<sup>a</sup> School of Materials Science and Engineering, Henan University of Science and Technology, Provincial and Ministerial Co-construction of Collaborative Innovation Center for Non-ferrous Metal new Materials and Advanced Processing Technology, Luoyang 471023, China

<sup>b</sup> Faculty of engineering, Huanghe Science and Technology College, Zhengzhou, Henan 450006, China

<sup>c</sup> Henan Key Laboratory of Non-Ferrous Materials Science & Processing Technology, Luoyang 471023, China

\* Corresponding author and E-mail address:

Prof. Yong Liu, liuyong209@haust.edu.cn;

Prof. Fengzhang Ren, renfz@haust.edu.cn;

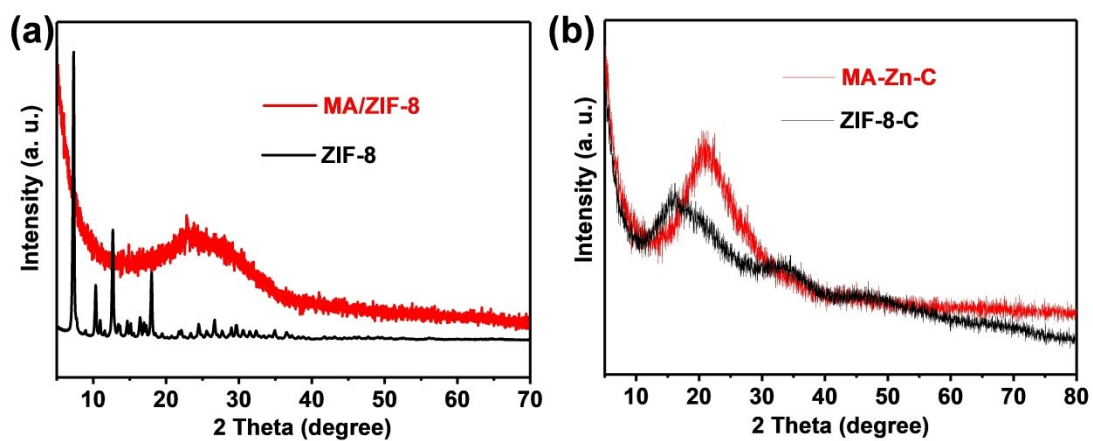

Figure S1. XRD patterns of (a) ZIF-8 and MA/ZIF-8, and (b) ZIF-8-C and MA-Zn-C.

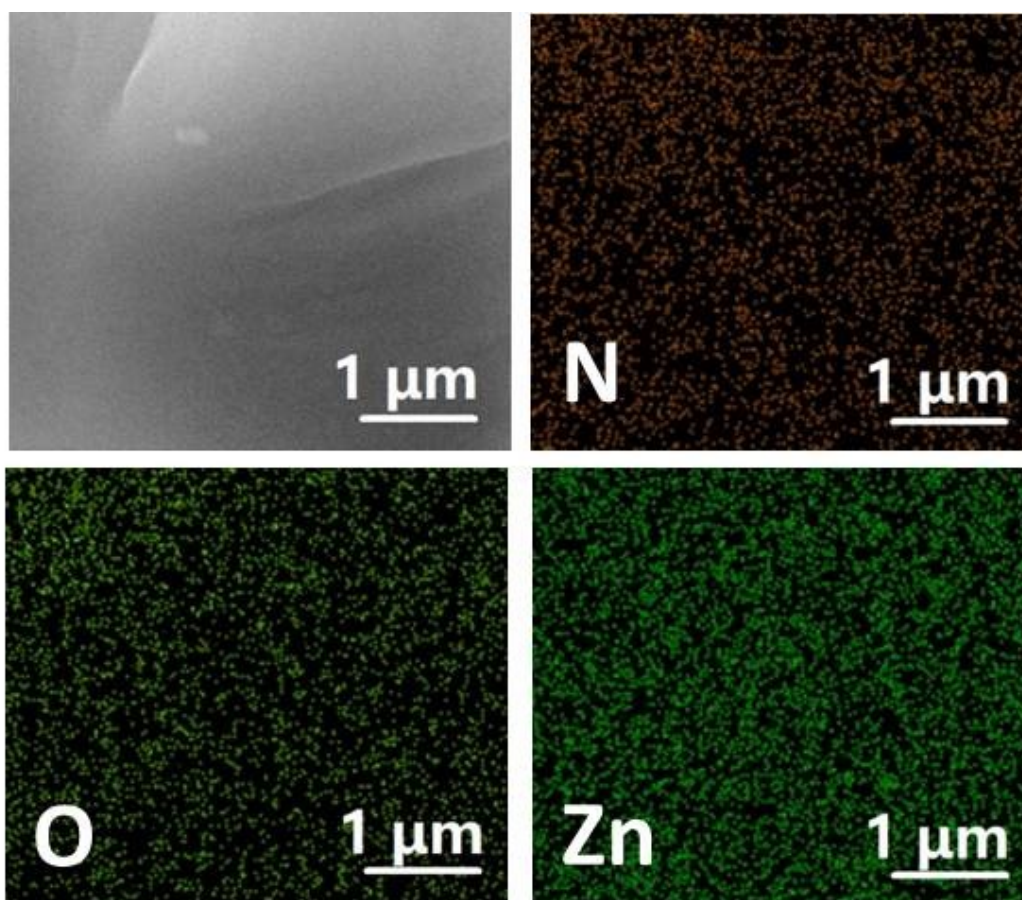

Figure S2. SEM images of MA-Zn-C, and the corresponding elemental mapping.

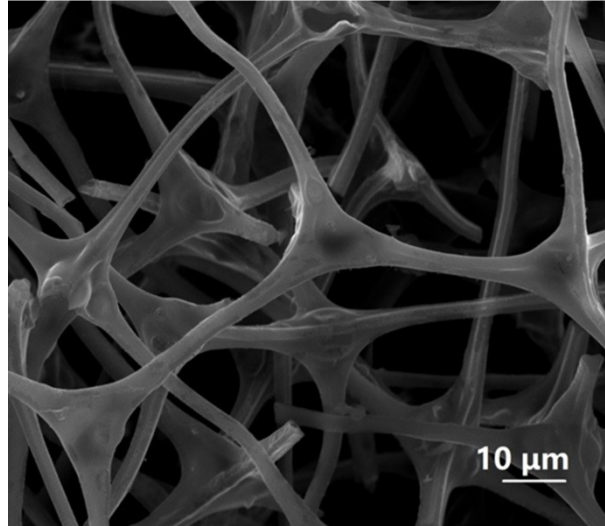

Figure S3. SEM image of MA-C.

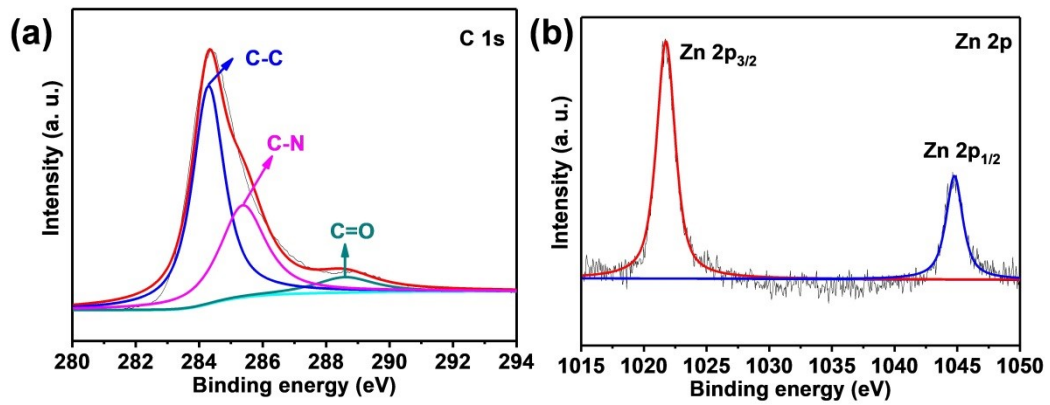

Figure S4. (a) C 1s and (b) Zn 2p XPS spectra of MA-Zn-C.

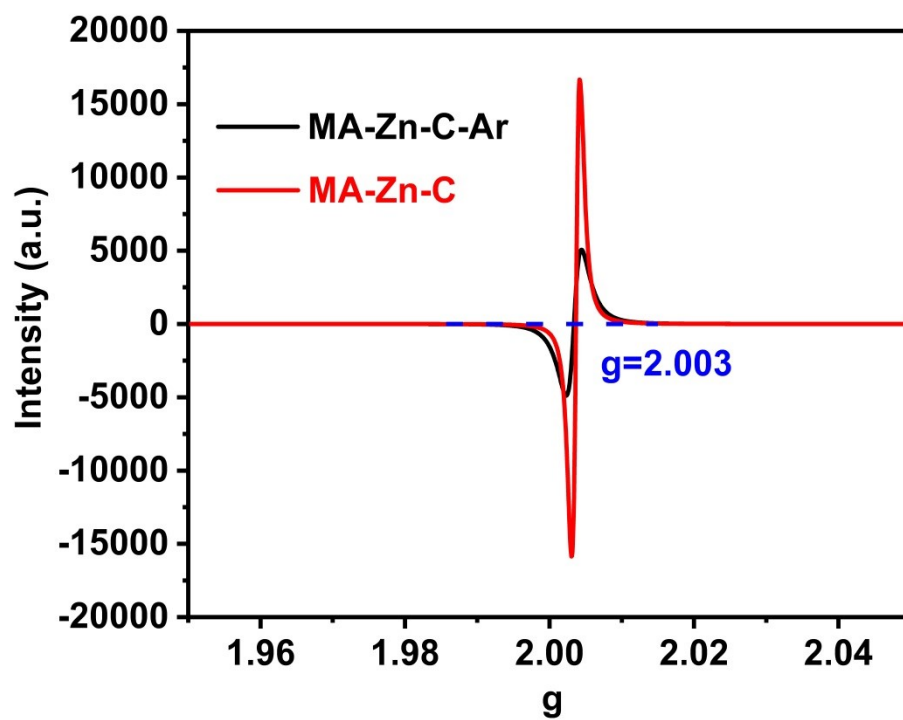

Figure S5. ESR spectra of prepared MA-Zn-C-Ar and MA-Zn-C.

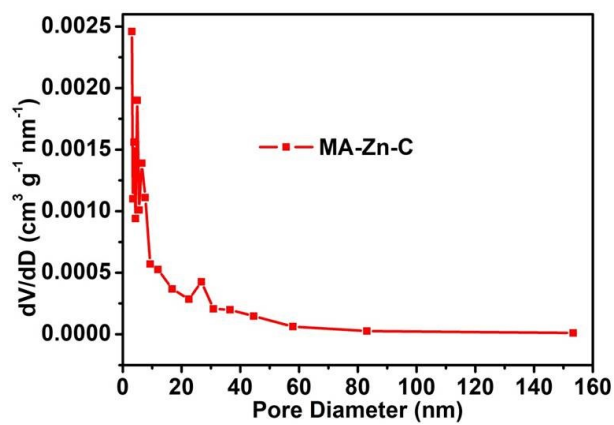

Figure S6. The pore size distribution curve of MA-Zn-C.

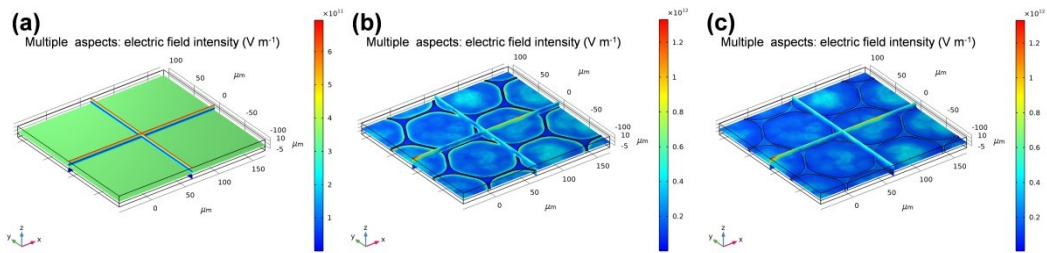

Figure S7. Electric field intensity distribution diagrams of (a) Cu foil, (b) MA-C, and (c) MA-Zn-C.

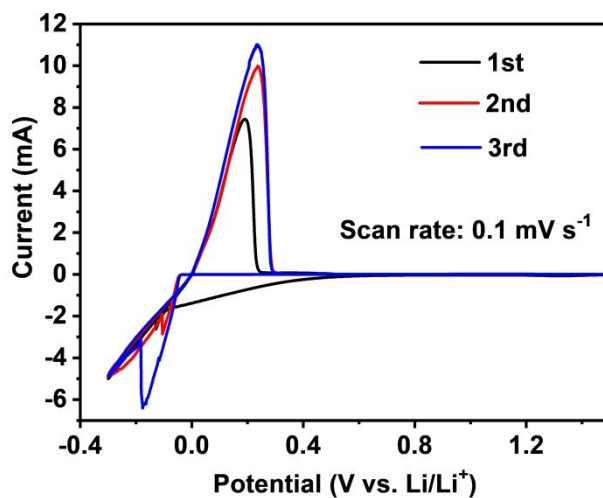

Figure S8. Cyclic voltammety curves of MA-Zn-C at the scan rate of  $0.1 \text{ mV s}^{-1}$ .

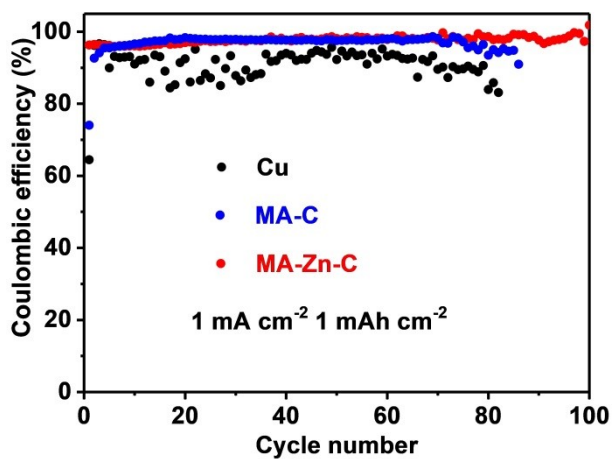

Figure S9. CE of Cu, MA-C and MA-Zn-C electrode with lithium deposition amount of  $1 \text{ mAh cm}^{-2}$  at  $1 \text{ mA cm}^{-2}$ .

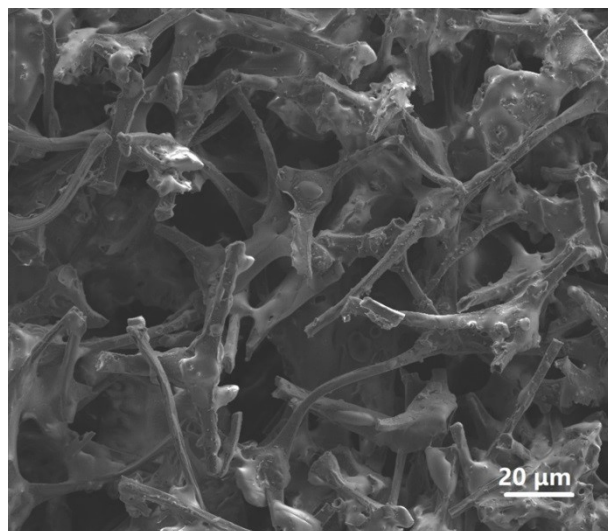

Figure S10. SEM image of MA-Zn-C-Li after Li stripping.

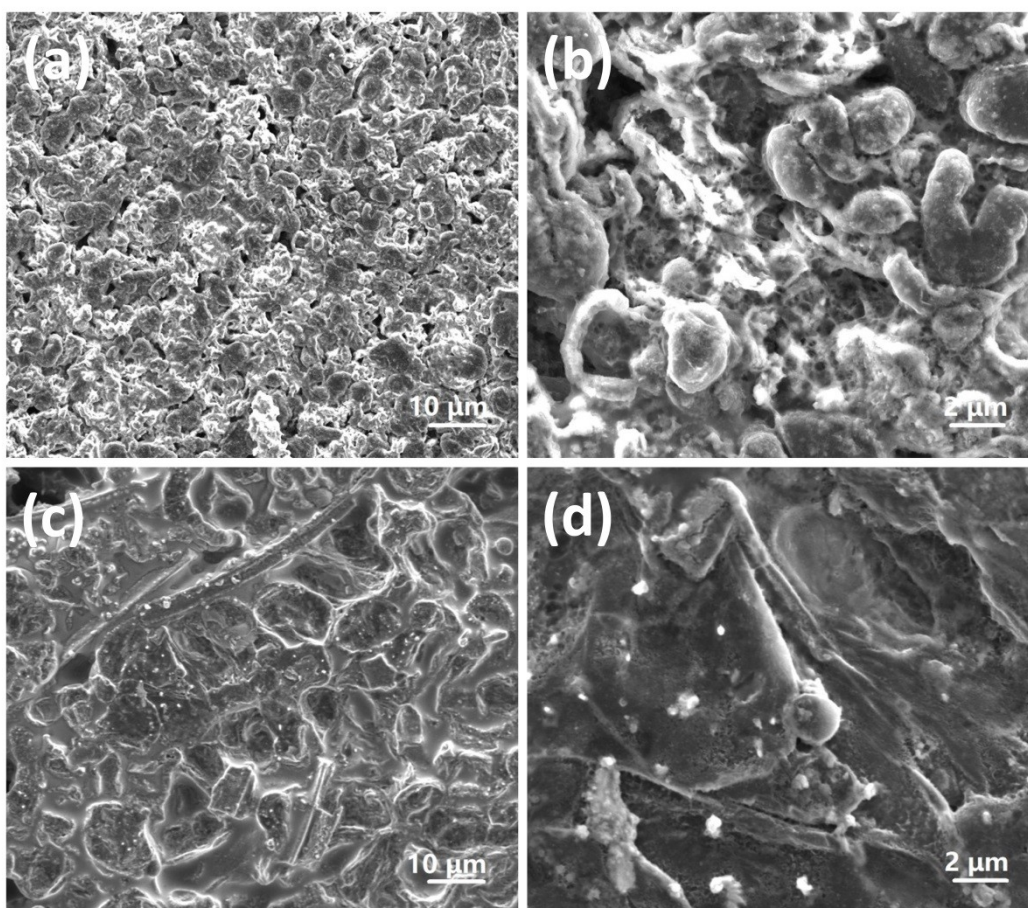

Figure S11. SEM images of (a,b) MA-C and (c,d) MA-Zn-C electrode after cycles at  $1 \text{ mA cm}^{-2}$ - $1 \text{ mAh cm}^{-2}$ .

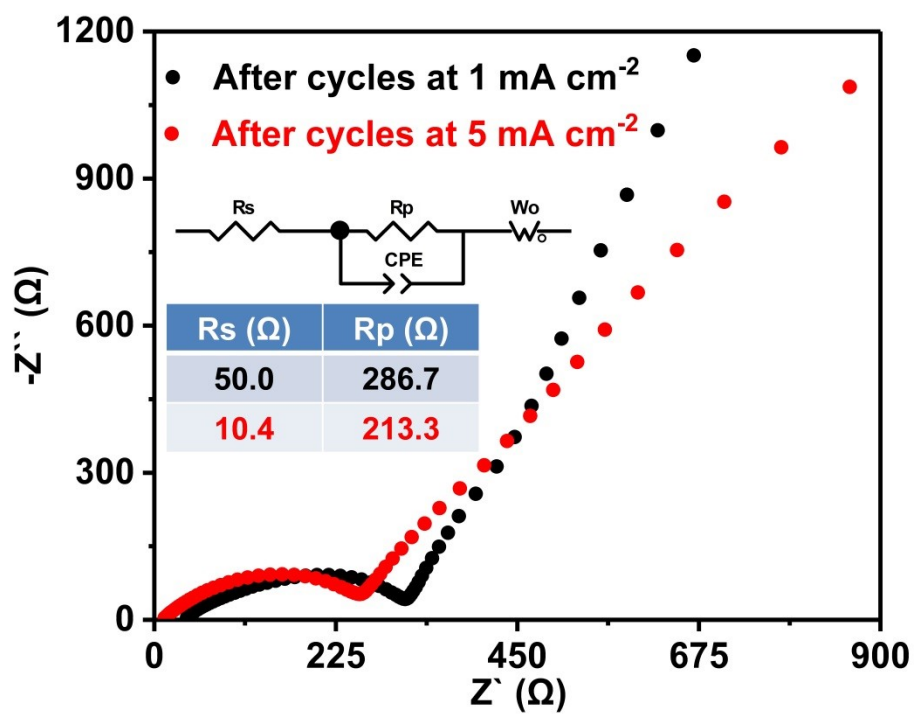

Figure S12. Nyquist plots of the MA-Zn-C-Li//MA-Zn-C-Li cells after cycles at 1 mA cm<sup>-2</sup> and 5 mA cm<sup>-2</sup>.

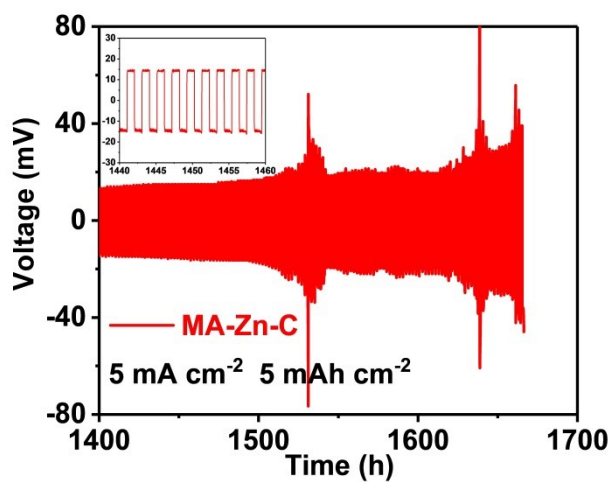

Figure S13. Consecutive cyclic performance of MA-Zn-C-Li//MA-Zn-C-Li symmetrical cell at 5 mA cm<sup>-2</sup>-5 mAh cm<sup>-2</sup>.

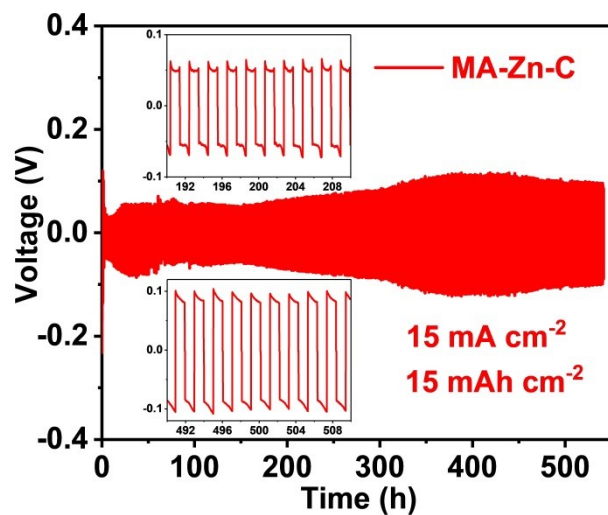

Figure S14. Cyclic performance of MA-Zn-C-Li//MA-Zn-C-Li symmetrical cell at  $15 \text{ mA cm}^{-2}$ - $15 \text{ mAh cm}^{-2}$ .

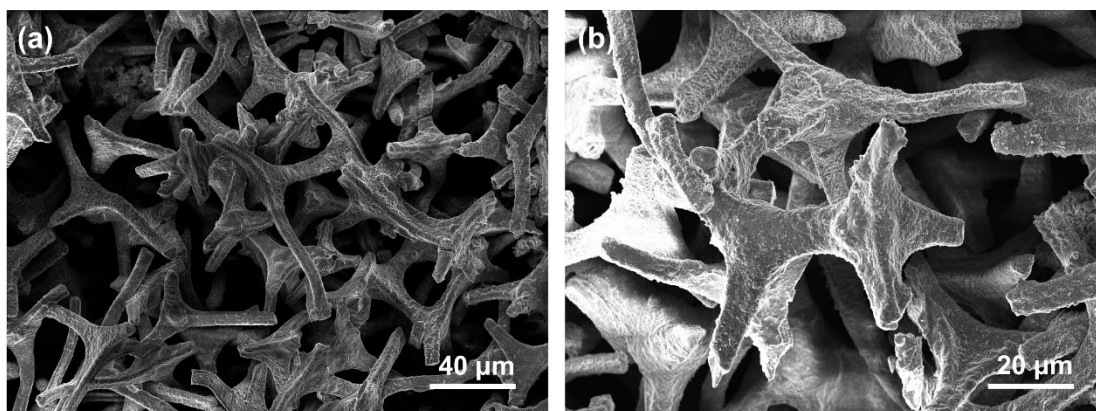

Figure S15. The SEM image of MA-Zn-C-Li after Li stripping.



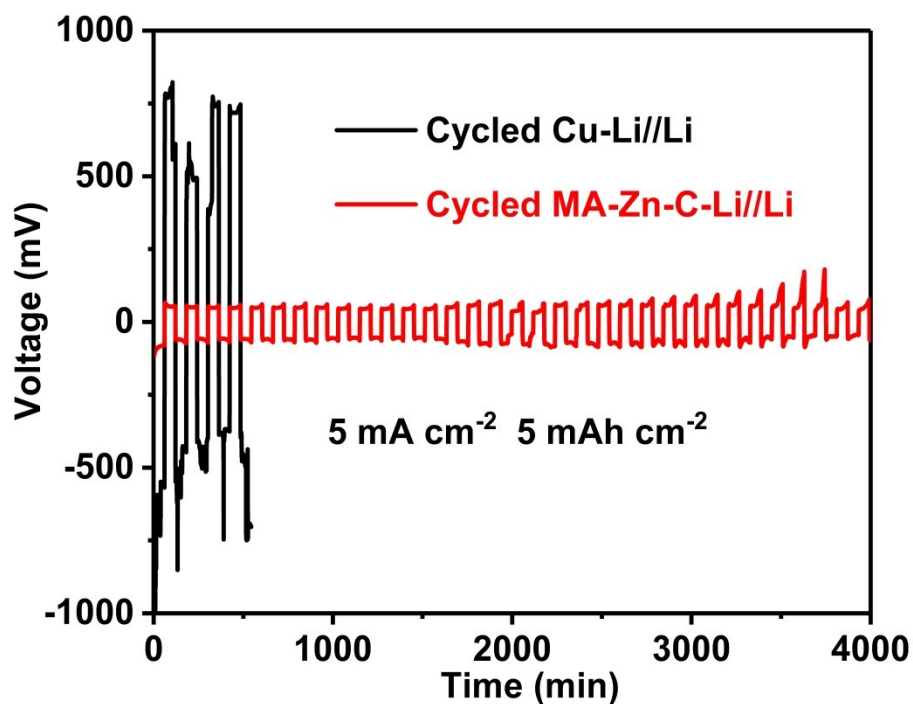

Figure S16. Electrochemical performances of cycled Cu-Li//Li and cycled MA-Zn-C-Li//Li at  $5 \text{ mA cm}^{-2}$  and  $5 \text{ mAh cm}^{-2}$  after long cycles.

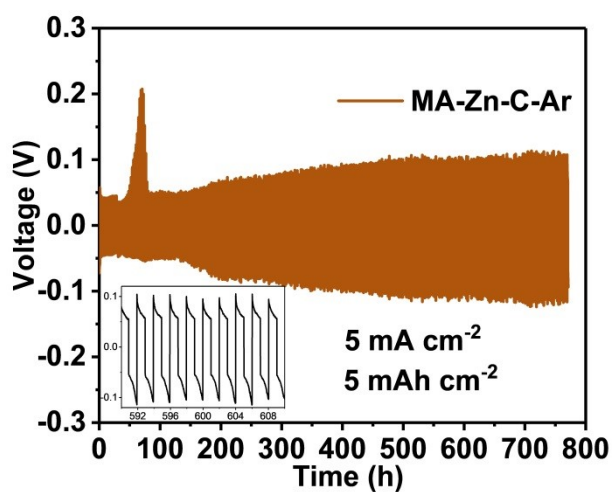

Figure S17. Cyclic performance of MA-Zn-C-Ar-Li//MA-Zn-C-Ar-Li symmetrical cell at  $5 \text{ mA cm}^{-2}$ - $5 \text{ mAh cm}^{-2}$ .

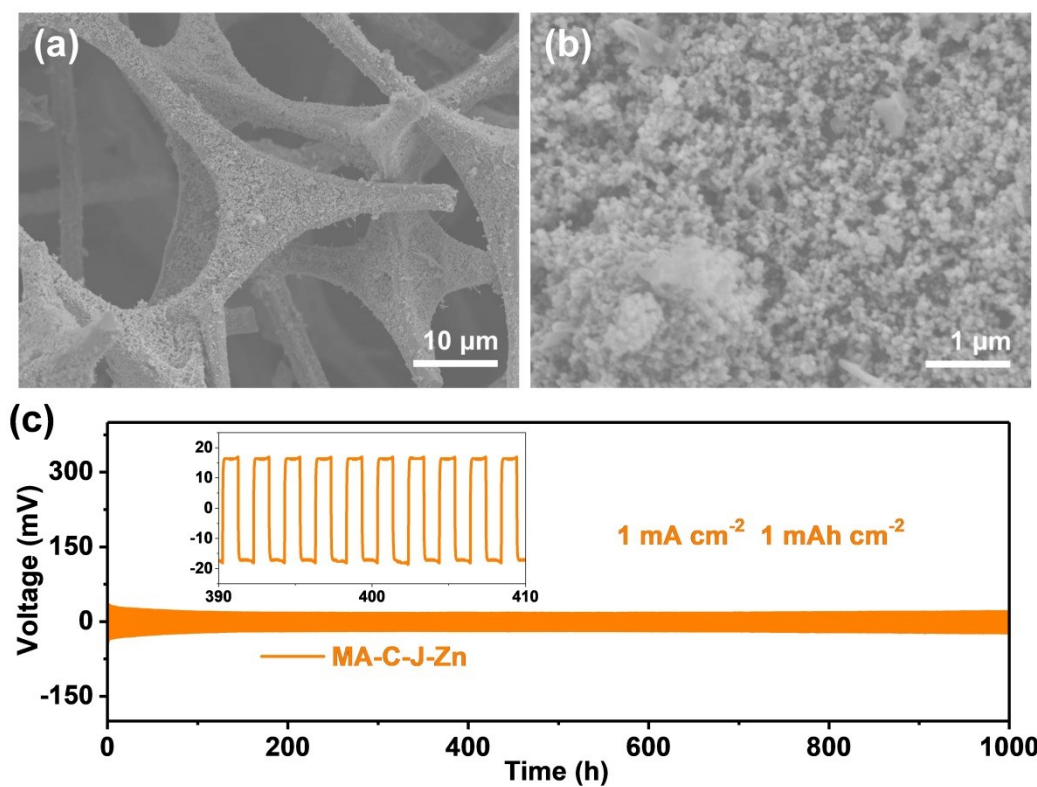

Figure S18. Cyclic performance of MA-C-J-Zn-Li// MA-C-J-Zn-Li symmetrical cell at  $1 \text{ mA cm}^{-2}$ - $1 \text{ mAh cm}^{-2}$ .

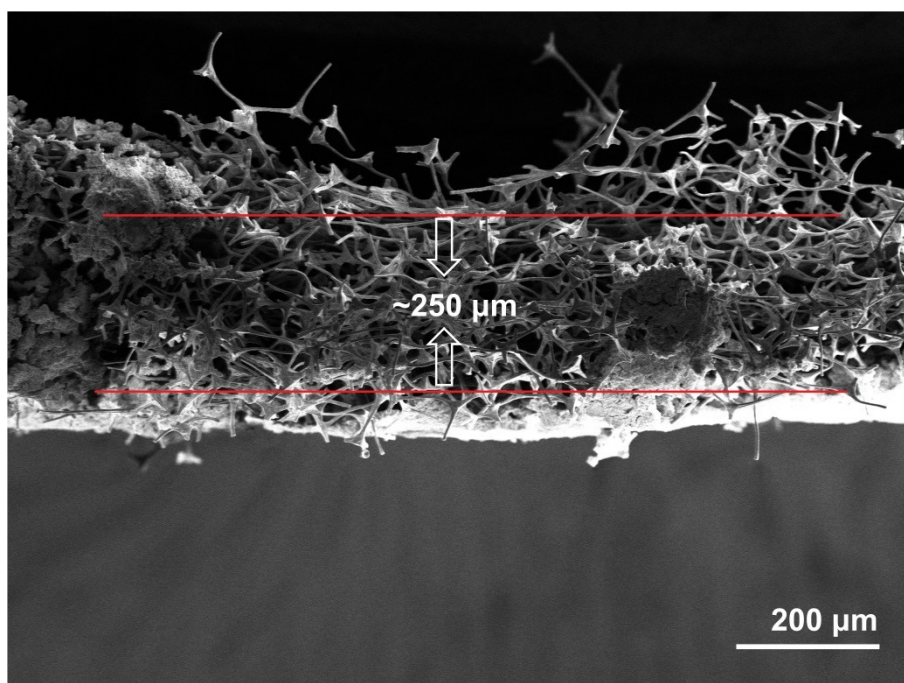

Figure S19. The sectional view of MA-Zn-C-Li composite used as the composite anode in full cells.

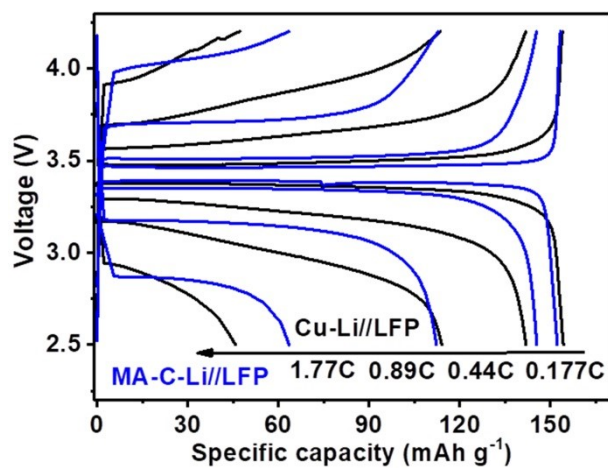

Figure S20. Charge/discharge curves of Cu-Li//LFP and MA-C-Li//LFP at various current densities.

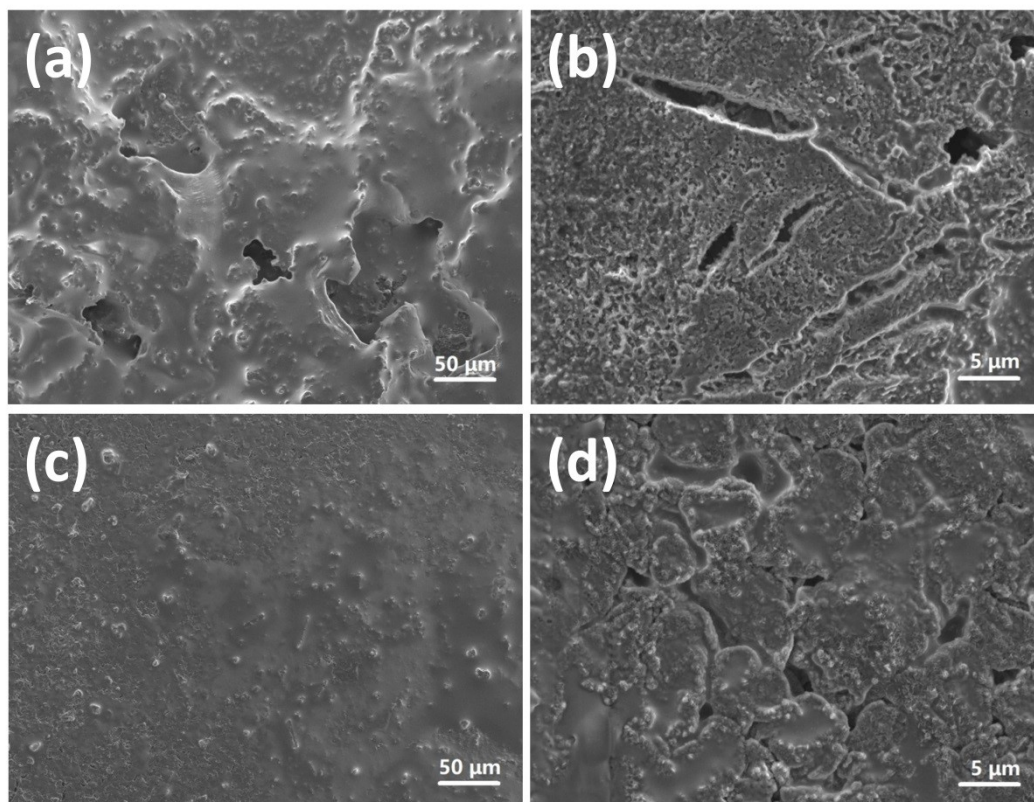

Figure S21. SEM images of Cu-Li//LFP (a,b) and MA-Zn-C-Li//LFP (c,d) at 0.44C after 200 cycles.

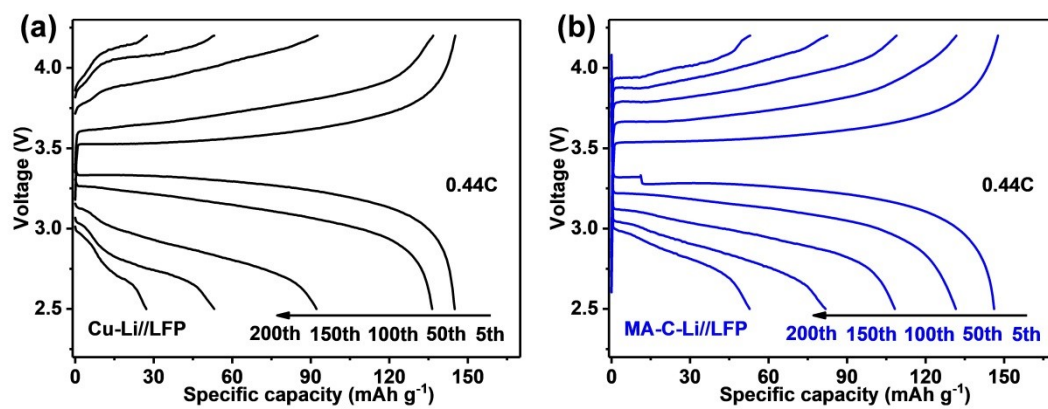

Figure S22. Charge/discharge curves of Cu-Li//LFP and MA-C-Li//LFP at 0.44C.

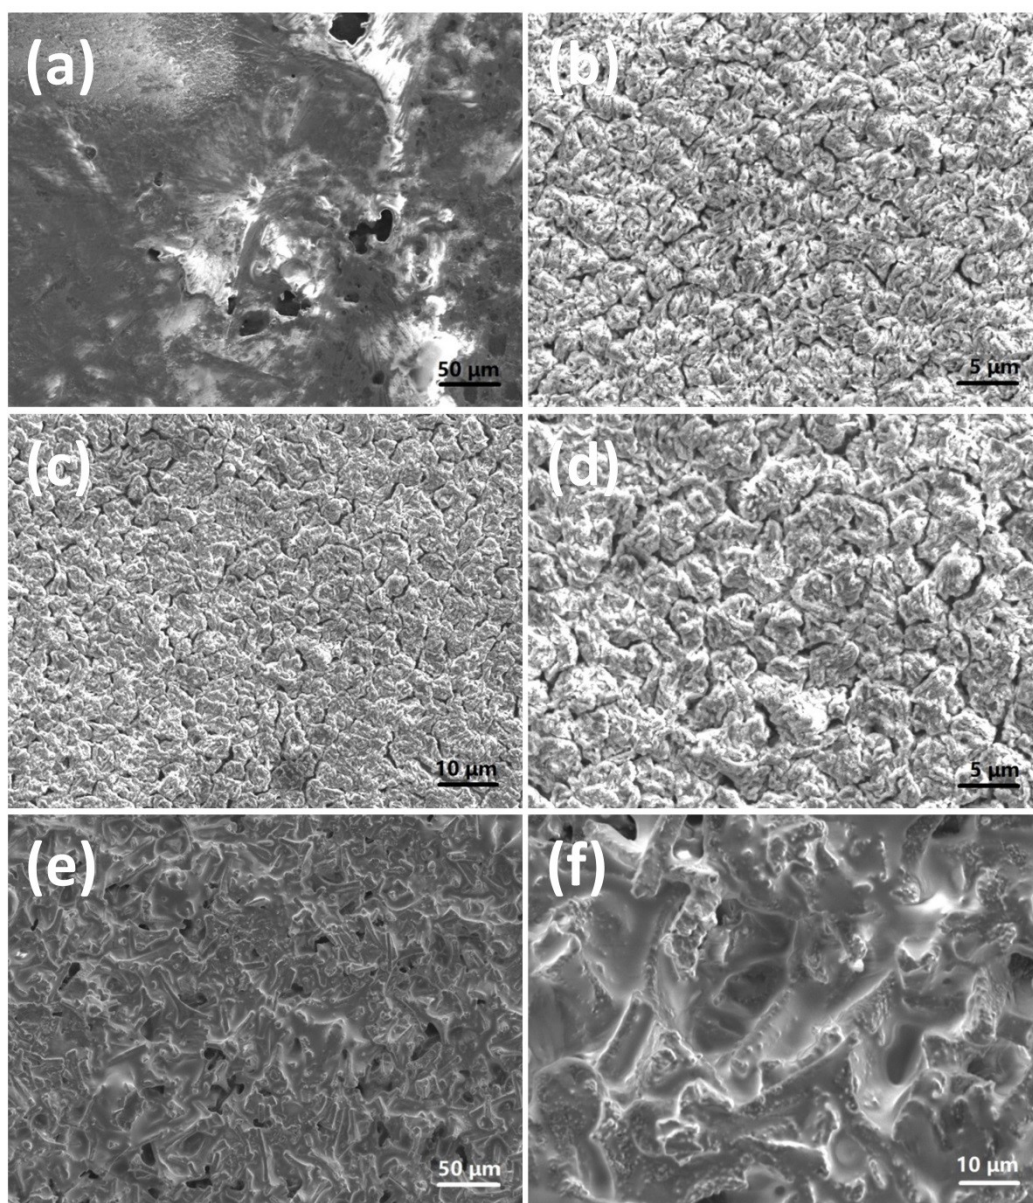

Figure S23. SEM images of Cu-Li//LFP (a,b), MA-C-Li//LFP (c,d) and MA-Zn-C-Li//LFP (e,f) at 1.77C after 500 cycles.

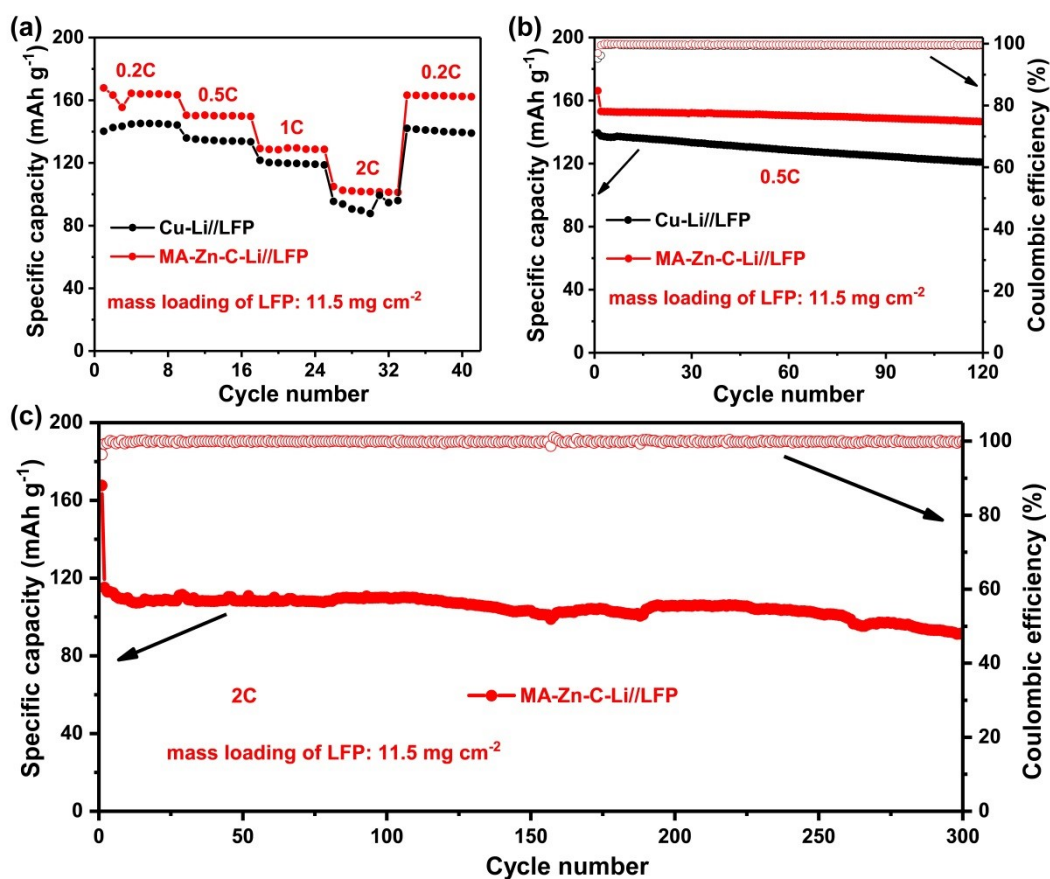

Figure S24. Electrochemical performances of full cells with Cu-Li or MA-Zn-C-Li anodes and LFP cathodes (mass loading: 11.5 mg cm<sup>-2</sup>). (a) Rate capacity of Cu-Li//LFP and MA-Zn-C-Li//LFP. (b) Cycling stability of Cu-Li//LFP and MA-Zn-C-Li//LFP at 0.5C. (c) Cycling stability of MA-Zn-C-Li//LFP at 2C.

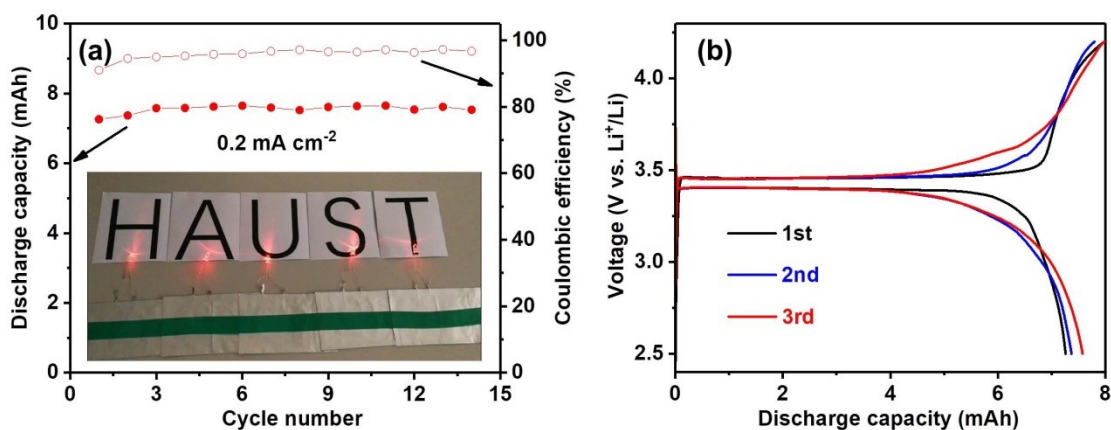

Figure S25. Electrochemical performances. (a) cycling performance of MA-Zn-C-Li//LFP pouch cells and (b) corresponding voltage profile.

Table S1. A survey of Li-based anodes with different carbon hosts and corresponding electrochemical properties with ether-based electrolyte.

| Anode                  | Current Density (mA cm <sup>-2</sup> ) | Capacity (mAh cm <sup>-2</sup> ) | Overpotential (mV) | Cycle Life (h) | Refer.    |
|------------------------|----------------------------------------|----------------------------------|--------------------|----------------|-----------|
| MA-Zn-C                | 1                                      | 1                                | 14                 | 1200           | This work |
|                        | 5                                      | 5                                | 16                 | 1500           |           |
|                        | 15                                     | 15                               | ~82                | 500            |           |
| C-400                  | 1                                      | 1                                | ~20                | 200            | 1         |
| CP/Sn/SnO <sub>2</sub> | 1                                      | 1                                | 16                 | 800            | 2         |
|                        | 2                                      | 1                                | 16                 | 250            |           |
| FO-GCNs                | 2                                      | 1                                | ~25                | 800            | 3         |
| CHEMP@Ni               | 5                                      | 2                                | ~25                | 1370           | 4         |
| ACrCFs                 | 1                                      | 1                                | ~15                | 1000           | 5         |
| NOCA@CF                | 1                                      | 0.5                              | ~14                | 800            | 6         |
|                        | 10                                     | 10                               | ~185               | 400            |           |
| NHCF/CN/ZnO            | 1                                      | 1                                | 25                 | 1032           | 7         |
|                        | 2                                      | 1                                | 25                 | 1032           |           |
| MCNFs/Ag               | 1                                      | 1                                | 20                 | 600            | 8         |
| Co@NPC                 | 10                                     | 1                                | 31                 | 200            | 9         |

**C-400**: carbon cloth derived from cotton at 400 °C

**CP**: carbon paper

**FO-GCNs**: functionalized onion-like graphitic carbon nanospheres

**CHEMP@Ni**: nickel particles embedded in the holes of carbonized natural porous structure (hemp)

**ACrCFs**: carbon nanofibers decorated with uniform  $\text{CrO}_{0.78}\text{N}_{0.48}$  nanoparticles

**NOCA@CF**: N/O dual doped 3D porous carbon architectures are designed on commercial Cu foam current collector

**NHCF/CN/ZnO**: Nitrogen doped hollow carbon fiber/carbon nanosheets/ZnO

**MCNFs/Ag**: 3D multichannel carbon fibers (MCNFs) that are decorated with lithiophilic Ag nanoparticles

**Co@NPC**: 3D carbon nanotubes and a N-doped carbon polyhedron core (PC) embedded with lithiophilic Co nanoparticles

#### References:

- (1) J. K. Meng, W. W. Wang, X. Y. Yue, H. Y. Xia, Q. C. Wang, X. X. Wang, Z. W. Fu, X. J. Wu and Y. N. Zhou, *Journal of Power Sources*, 2020, **465**.
- (2) L. Tan, S. H. Feng, X. H. Li, Z. X. Wang, W. J. Peng, T. C. Liu, G. C. Yan, L. J. Li, F. X. Wu and J. X. Wang, *Chemical Engineering Journal*, 2020, **394**.
- (3) S. Ha, J. C. Hyun, J. H. Kwak, H. D. Lim and Y. S. Yun, *Small*, 2020, **16**.
- (4) P. F. Wang, Z. Gong, K. Ye, Y. Y. Gao, K. Zhu, J. Yan, G. L. Wang and D. X. Cao, *Electrochimica Acta*, 2020, **356**.
- (5) J. Xiao, N. Xiao, C. Liu, H. Q. Li, X. Pan, X. Y. Zhang, J. P. Bai, Z. Guo, X. Q. Ma and J. S. Qiu, *Small*, 2020, **16**.
- (6) Y. L. An, Y. Tian, Y. Li, C. L. Wei, Y. Tao, Y. P. Liu, B. J. Xi, S. L. Xiong, J. K. Feng and Y. T. Qian, *Chemical Engineering Journal*, 2020, **400**.
- (7) X. L. Zhang, Z. Q. Ruan, Q. T. He, X. J. Hong, X. Song, Q. F. Zheng, J. H. Nie, Y. P. Cai and H. X. Wang, *Acs Applied Materials & Interfaces*, 2021, **13**, 3078-3088.
- (8) L. Yu; Q. Su; B. Li; W. Liu; M. Zhang; S. Ding; G. Du; B. Xu. *Electrochimica Acta* **2020**, **362**.
- (9) R. Jiang; W. Diao; D. Xie; F. Tao; X. Wu; H. Sun; W. Li; J. Zhang. *ACS Applied Energy Materials* **2021**, **4** (11), 12871-12881.
